# Supplementary material for: In vitro selection of Giardia duodenalis for Albendazole resistance identifies a β-tubulin mutation at amino acid E198K
Source: PubMed Central journal article supplement — Int J Parasitol Drugs Drug Resist. 2021 Jun 10;16:162–73. doi: 10.1016/j.ijpddr.2021.05.003 (PMC8267433; doi:10.1016/j.ijpddr.2021.05.003), 2021-06-10

## **Supplementary Information**

*In vitro* selection of *Giardia duodenalis* for Albendazole resistance identifies a  $\beta$ -tubulin mutation at amino acid E198K

Samantha J. Emery-Corbin, Qiao Su, Swapnil Tichkule, Louise Baker, Ernest Lacey, Aaron R. Jex

### **Corresponding Author:**

Dr Samantha Jane Emery-Corbin

Population Health and Immunity Division, The Walter and Eliza Hall Institute of Medical Research  
Parkville, Victoria, 3052

Australia

Email: [emery.s@wehi.edu.au](mailto:emery.s@wehi.edu.au)

Phone: +61-3-9345-2656

**Supplementary Tables:**

**Supplementary Table 1.** Homology modelling results of *Giardia* beta-tubulin monomer with respect to its template.

| <b>Template</b> | <b>Species</b>      | <b>Sequence Identity (%)</b> | <b>GMQE</b> | <b>QMEAN</b> |
|-----------------|---------------------|------------------------------|-------------|--------------|
| 5C8Y_D          | <i>Sus barbatus</i> | 88.28                        | 0.81        | -1.30        |
| 1SA0_B          | <i>Bos taurus</i>   | 88.76                        | 0.77        | -5.67        |
| 3N2G_D          | <i>Ovis aries</i>   | 88.03                        | 0.76        | -5.58        |

**Supplementary Figure Legends:**

**Supplementary Figure S1:** Dose response curves of the 13 BZ class compounds, as well as podophyllotoxin and metronidazole, which were tested against AlbS and AlbR isogenic lines.

**Supplementary Figure S2:** Dose response curves of the 9 Alb structural analogues which were tested against AlbS and AlbR isogenic lines.

**Supplementary Figure S3:** Multiple sequence alignment of  $\beta$ -tubulin from *Giardia duodenalis* and other microaerophilic protists with sequences from helminths, fungi and higher eukaryotes showing the conserved residues indicated with an arrow include those implicated in anthelmintic resistance indicated (F167, E198, F200) as well as the *Giardia*-specific C136 modelled to form a hydrogen-bond with Alb in Figure 4A.

**Supplementary Figure S4:** One binding mode of Alb, where all conserved residues (F167, E198, F200) are forming non-bonded interaction with *Giardia*  $\beta$ -tubulin, but none are involved in hydrogen bonding.

**Supplementary Figure S5:** Sequencing chromatograms for the three technical replications of AlbS (DMSO1-3) and AlbR (Alb1-3) showing the trace for each of the sequencing regions including nucleotides corresponding to amino acids 134, 165, 167, 198 and 200 of *Giardia*  $\beta$ -tubulin. The E198K heterozygous single-nucleotide polymorphism (SNP) is shown in the three Alb replicates via a red arrow.

**Supplementary Figure S2:** IC<sub>50</sub> dose response curves for albendazole (above) and 3 other BZ compounds (mebendazole, parbendazole, oxibendazole (below) in MtzR isogenic lines WB-MtzR (WB-M3) and WB-MtzS (WB-1B) (Ansell et al., 2017). These demonstrate the MtzR line always has enhanced tolerance to Albendazole varying between 25-75% maximal inhibition compared to its MtzS parent (above), but no change in IC<sub>50</sub> or shift in the dose response, indicative of enhanced survival at higher Alb concentration. The same response was also observed for other BZ compounds (below), and was equivalent between BZ-compounds with 5' pharmacophores which undergo redox-based metabolism (Alb, mebendazole) and those which do not (parbendazole, oxibendazole).

# Supplementary Figure S1:

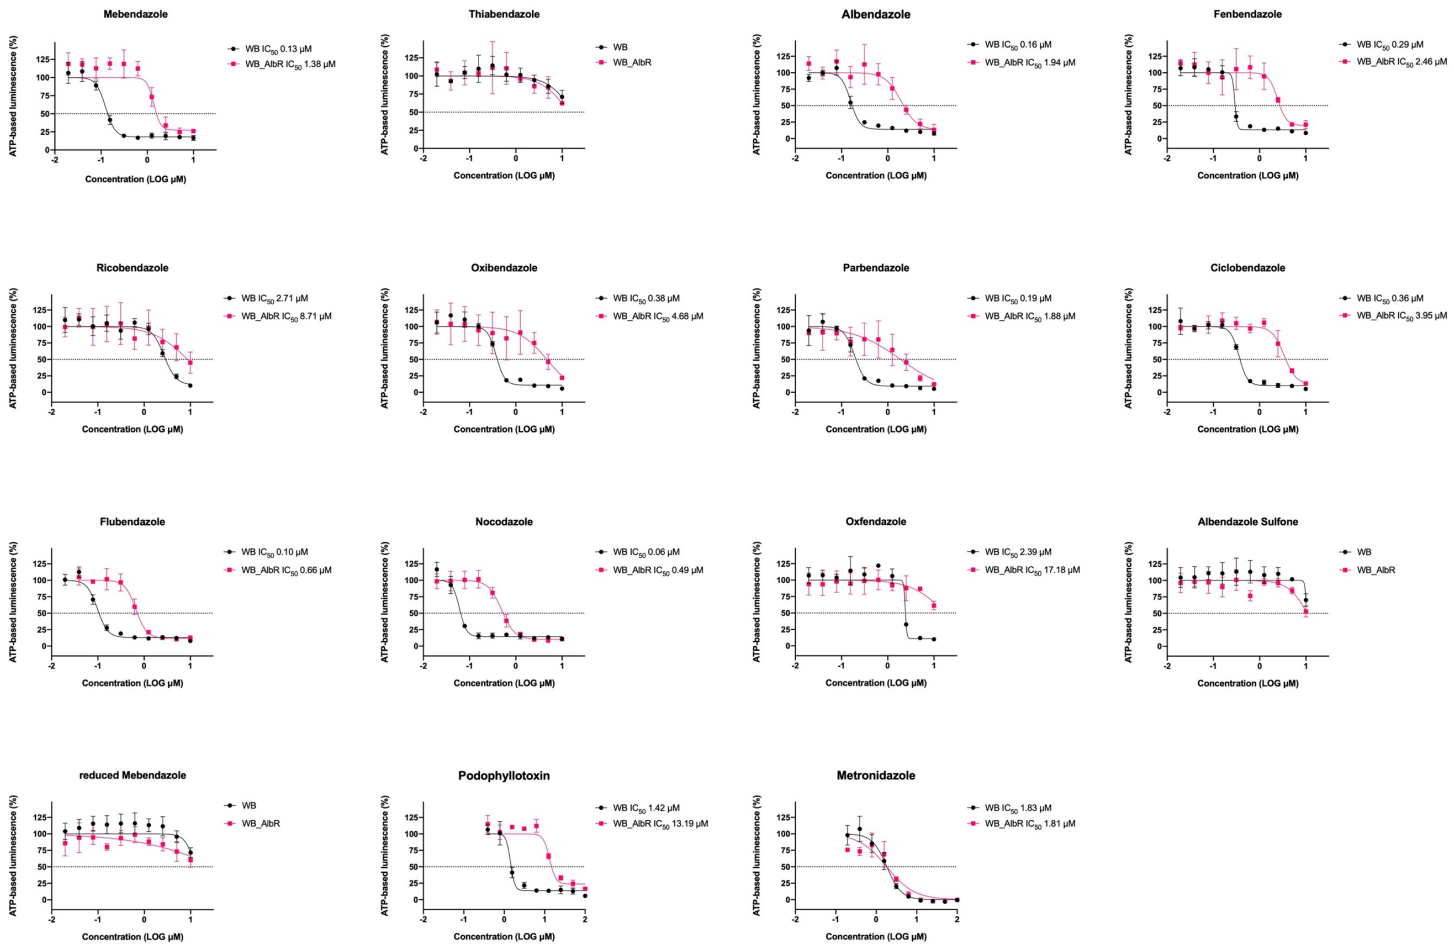

## Supplementary Figure S2:

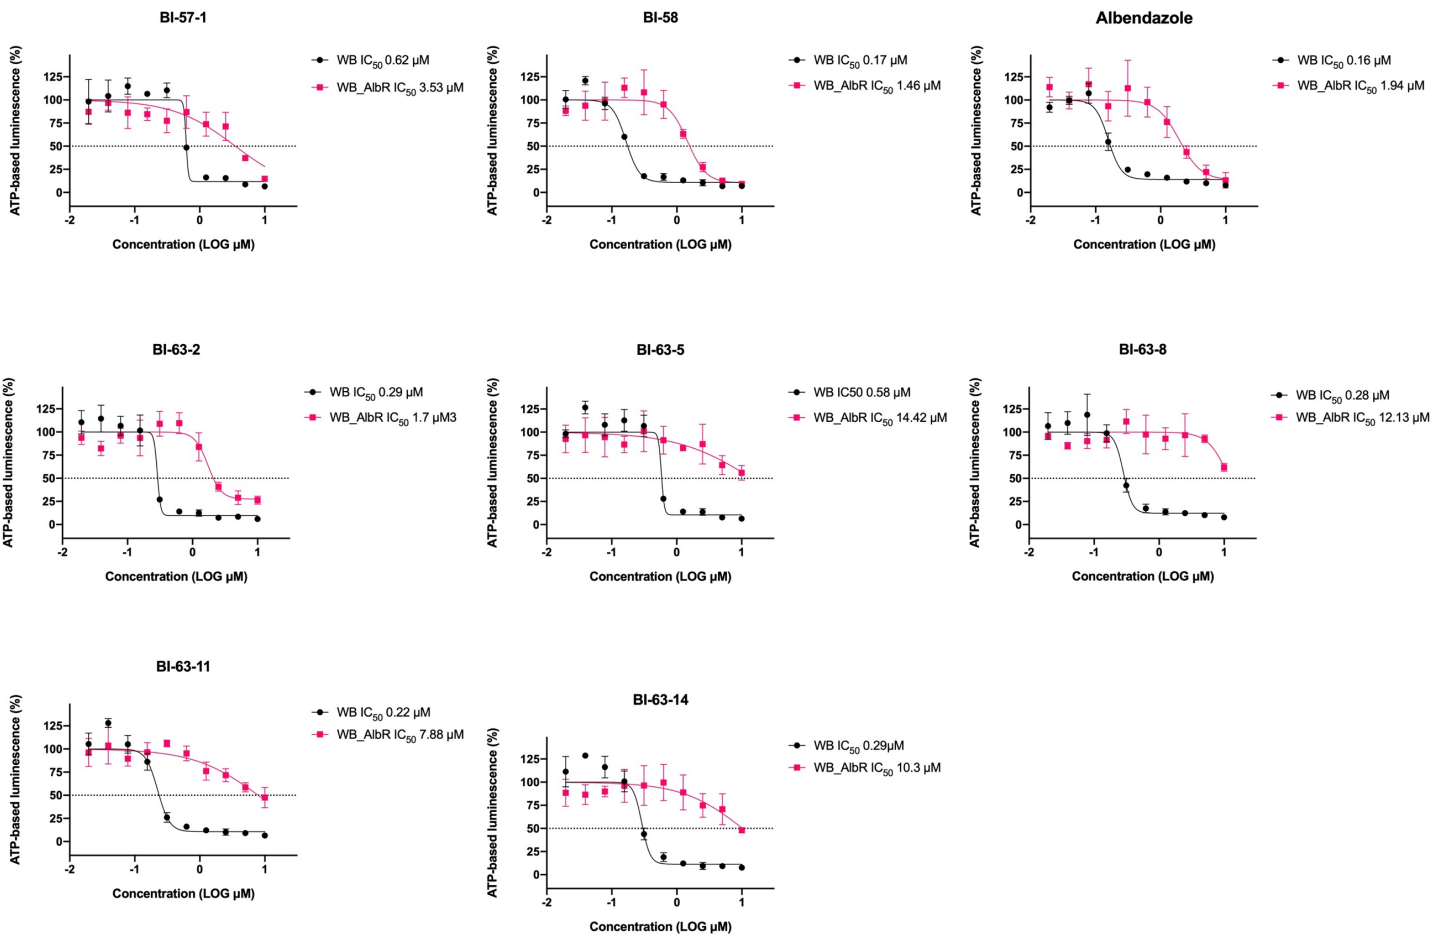



Supplementary Figure S4:

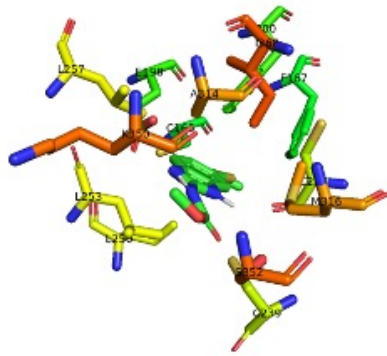

# Supplementary Figure S5:

134

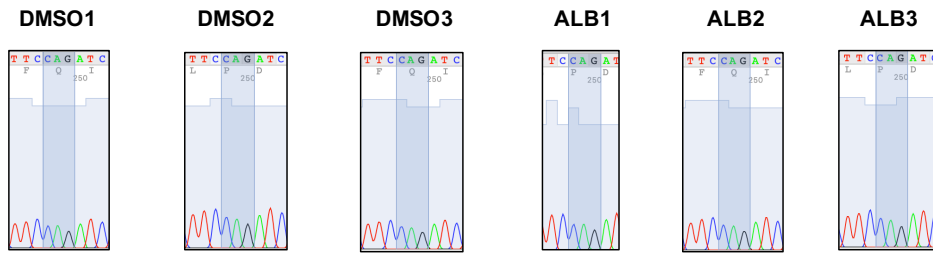

165, 167

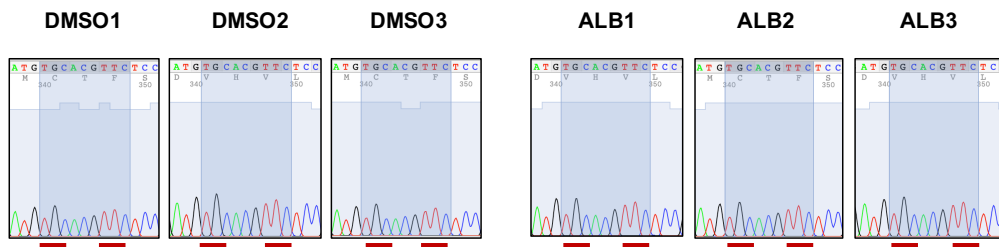

198, 200

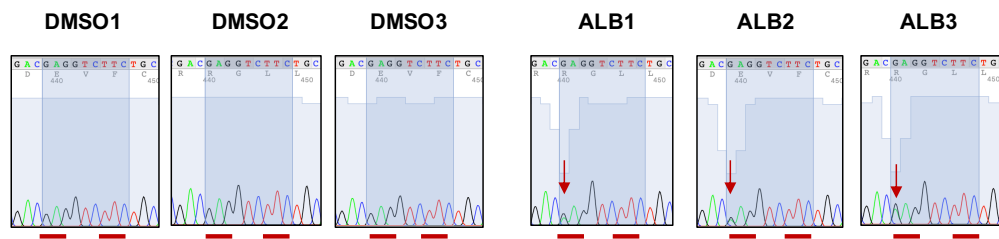



Supplementary Figure S6:

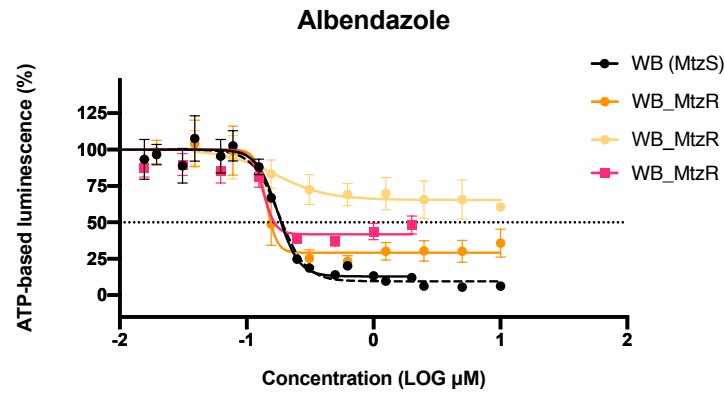

BZ-Susceptibility in MtzR (Replicate 1)

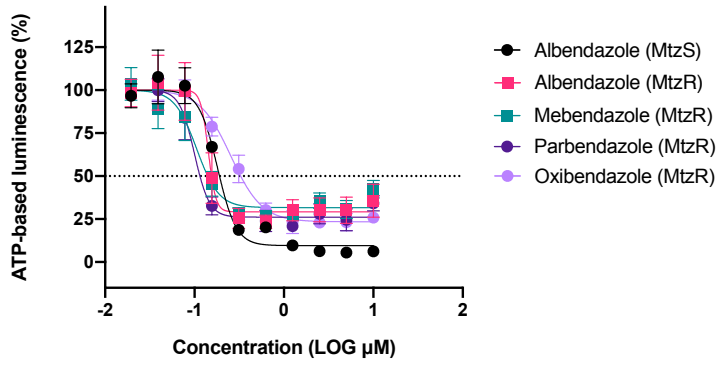

BZ-Susceptibility in MtzR (Replicate 2)

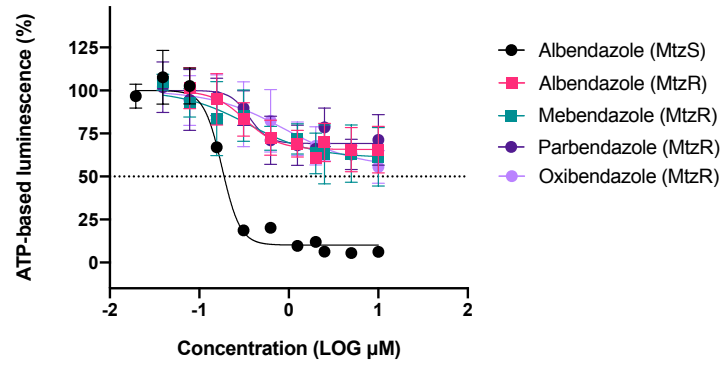

Supplement: mmc1.pdf [file mmc1.pdf]
